# Supplementary material
Source: PubMed Central journal article supplement (PMC5683415)
Supplement: NIHMS905831-supplement-1.pdf [file NIHMS905831-supplement-1.pdf]

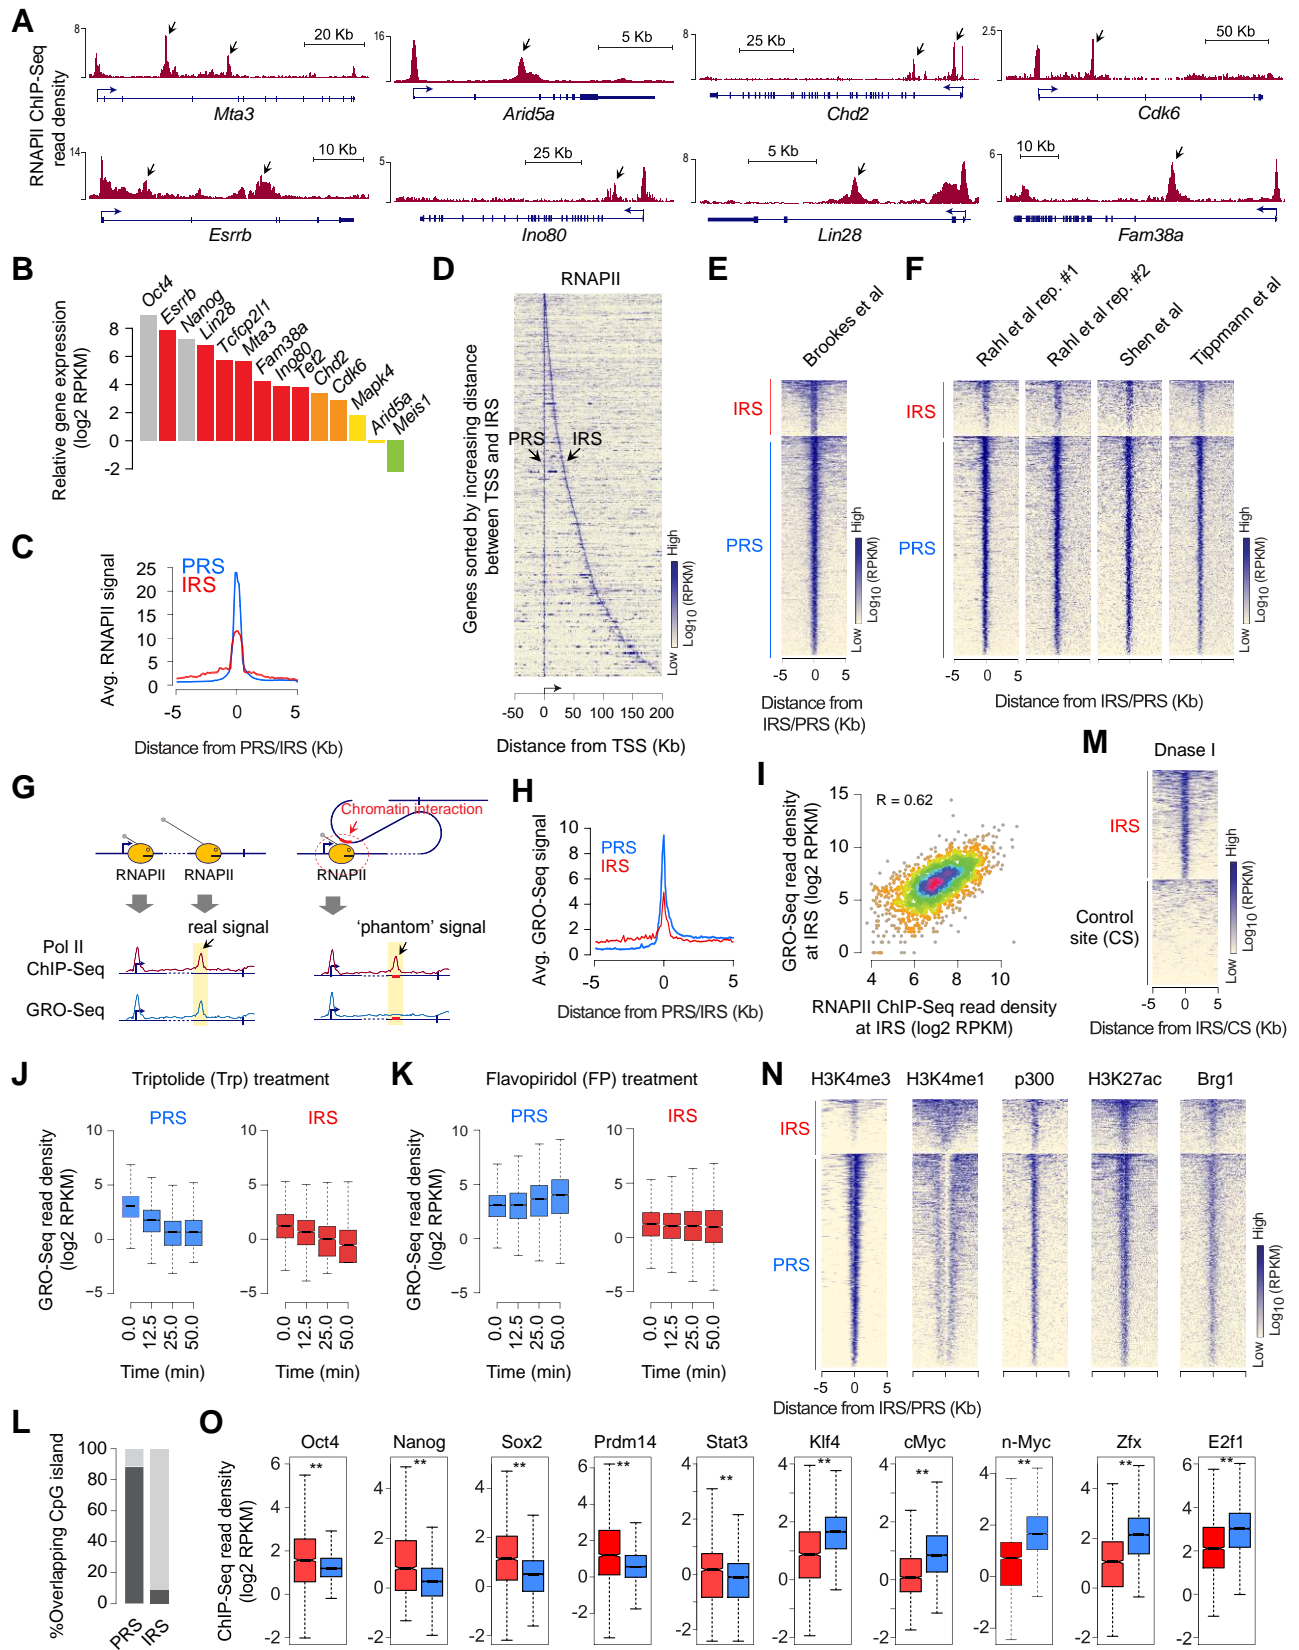

**Figure S1 (related to Figures 1 and 2). Intragenic sites of RNAPII enrichment mark transcriptionally active intragenic enhancers**

- (A) ChIP-Seq profiles of RNAPII occupancy at select genes *Mta3*, *Arid5a*, *Chd2*, *Cdk6*, *Esrrb*, *Ino80*, *Lin28* and *Fam38a (Peizo1)* in mouse ESCs (Brookes et al., 2012).
- (B) Expression (RPKM), as measured using RNA-Seq in mouse ESCs (Brookes et al., 2012), of IRS-containing genes (in color) and master ESC transcription factors *Oct4* and *Nanog* (gray). Genes are sorted by expression (red/gray, top quartile; orange, second quartile; yellow, third quartile; green, bottom quartile).
- (C) Read density plot showing average RNAPII occupancy (RPKM) at PRSs and IRSs.
- (D) Heatmap representation of relative levels of RNAPII ChIP-Seq read density at IRS-containing genes. Each row represents an IRS-containing gene, with the genes aligned at their TSSs (zero on the x-axis). Genes are sorted (top to bottom; y-axis) by increasing distance between TSS and IRS. About 90% of the IRS-containing genes, with IRSs within 200 Kb of their TSSs, are shown.
- (E,F) Heatmap representation of relative levels of RNAPII ChIP-Seq read density around IRSs and PRSs in mouse ESCs (Brookes et al., 2012; Rahl et al., 2010; Shen et al., 2012; Tippmann et al., 2012). Sites (rows) within the IRS/PRS class are ordered (top-to-bottom) based on total read count within each row.
- (G) Schematic showing how a site inferred to have a RNAPII ChIP-Seq peak could be an artifact (phantom peak) due to chromatin interaction it has with one or more other sites with RNAPII occupancy. GRO-Seq is insensitive to chromatin interactions (since it measures nascent RNA).
- (H) Read density plot showing average nascent RNA enrichment (RPKM), as measured using GRO-Seq in mouse ESCs (Jonkers et al., 2014), at PRSs and IRSs.
- (I) Scatter plot showing the correlation between the levels of RNAPII occupancy (Brookes et al., 2012) (x-axis) and nascent RNA (Jonkers et al., 2014) (GRO-Seq; y-axis) at IRSs in mouse ESCs.
- (J,K) Nascent RNA dynamics at IRSs in mouse ESCs treated with Triptolide (J) or Flavopiridol (K). Box plots showing changes in GRO-Seq read density (RPKM) upon Triptolide or Flavopiridol treatment at PRSs and IRSs over time.
- (L) Overlap with CpG islands (annotations downloaded from the UCSC genome browser).
- (M) Heatmap representation of relative levels of DNase I hypersensitivity, as measured using DNase-Seq (ENCODE, GSE37074), at IRSs and matched non-IRS intragenic control sites in mouse ESCs. Sites (rows) within each class are ordered (top-to-bottom) based on total read count within each row.
- (N) Heatmap representation of relative levels of H3K4me3 (ENCODE, GSE31039), H3K4me1 (Creyghton et al., 2010), H3K27ac (ENCODE, GSE31039), p300 (Creyghton et al., 2010),

and Brg1 (Ho et al., 2009) occupancy, as measured using CHIP-Seq, at PRSs and IRSs in mouse ESCs. Sites (rows) within the IRS/PRS class are ordered (top-to-bottom) based on total read count within each row.

- (O) Box plot representation showing relative levels (RPKM) of binding of various transcription factors at IRSs and PRSs in mouse ESCs (Chen et al., 2008; Ho et al., 2011; Ma et al., 2011; Marson et al., 2008).  $**P < 2.2 \times 10^{-16}$  (Wilcoxon-Mann-Whitney U test; two-sided).

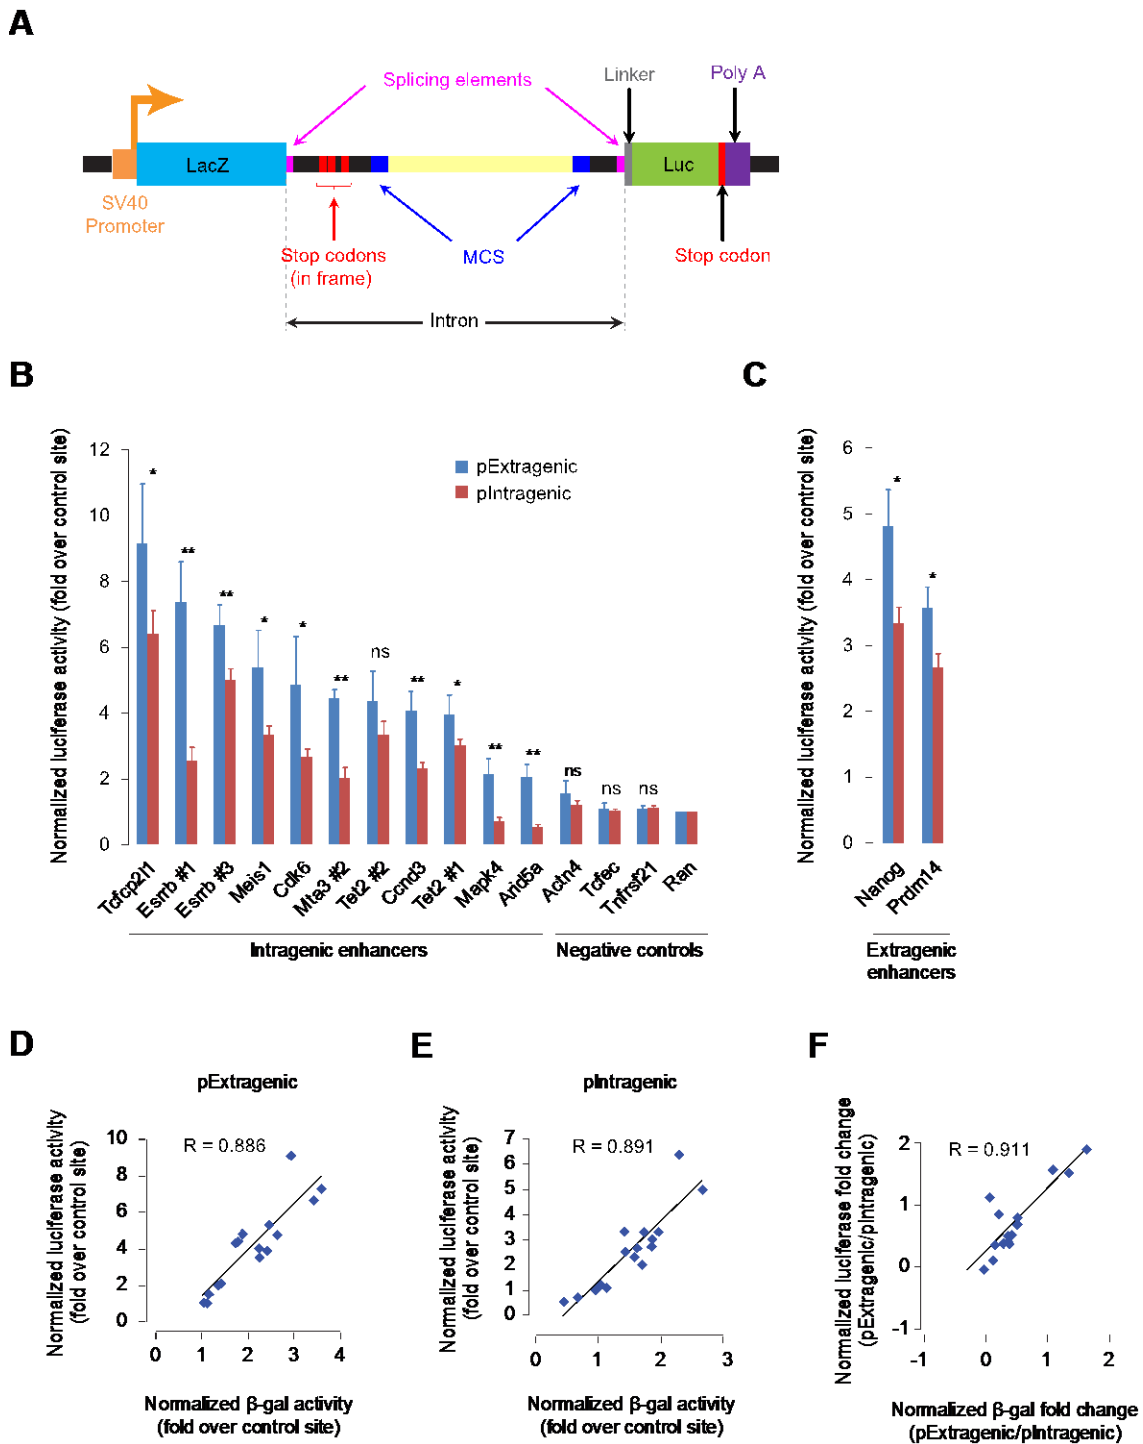

**Figure S2 (related to Figure 3). Enhancers in intragenic position attenuate reporter activity**

(A) Double-reporter construct encoding  $\beta$ -galactosidase ( $\beta$ -gal) and luciferase proteins within a single reading frame but on separate exons, with an intervening intron sequence containing stop codons (Nasim et al., 2002). MCS: multiple cloning site.

- (B, C) Normalized luciferase activity, in mouse ESCs, from pIntragenic and pExtragenic reporter constructs (Figure 2C) cloned with intragenic enhancers or negative controls (B) or extragenic enhancers (C). Data are normalized to control sequence from Ran locus, which is set to 1. Data represents mean of  $n = 5$  to 15 biological replicates. Error bars represent SEM. \* $P < 0.05$ ; \*\*  $P < 0.01$  (Student's t-test; two-sided); ns, not significant.
- (D, E) Scatter plot showing the correlation between normalized luciferase activity (y-axis) and normalized  $\beta$ -gal activity (x-axis) observed using either pExtragenic (D) or pIntragenic (E) reporter constructs.
- (F) Scatter plot showing the correlation between normalized luciferase fold change in pExtragenic vs pIntragenic reporter constructs (y-axis) and normalized  $\beta$ -gal fold change in pExtragenic vs pIntragenic reporter constructs (x-axis).

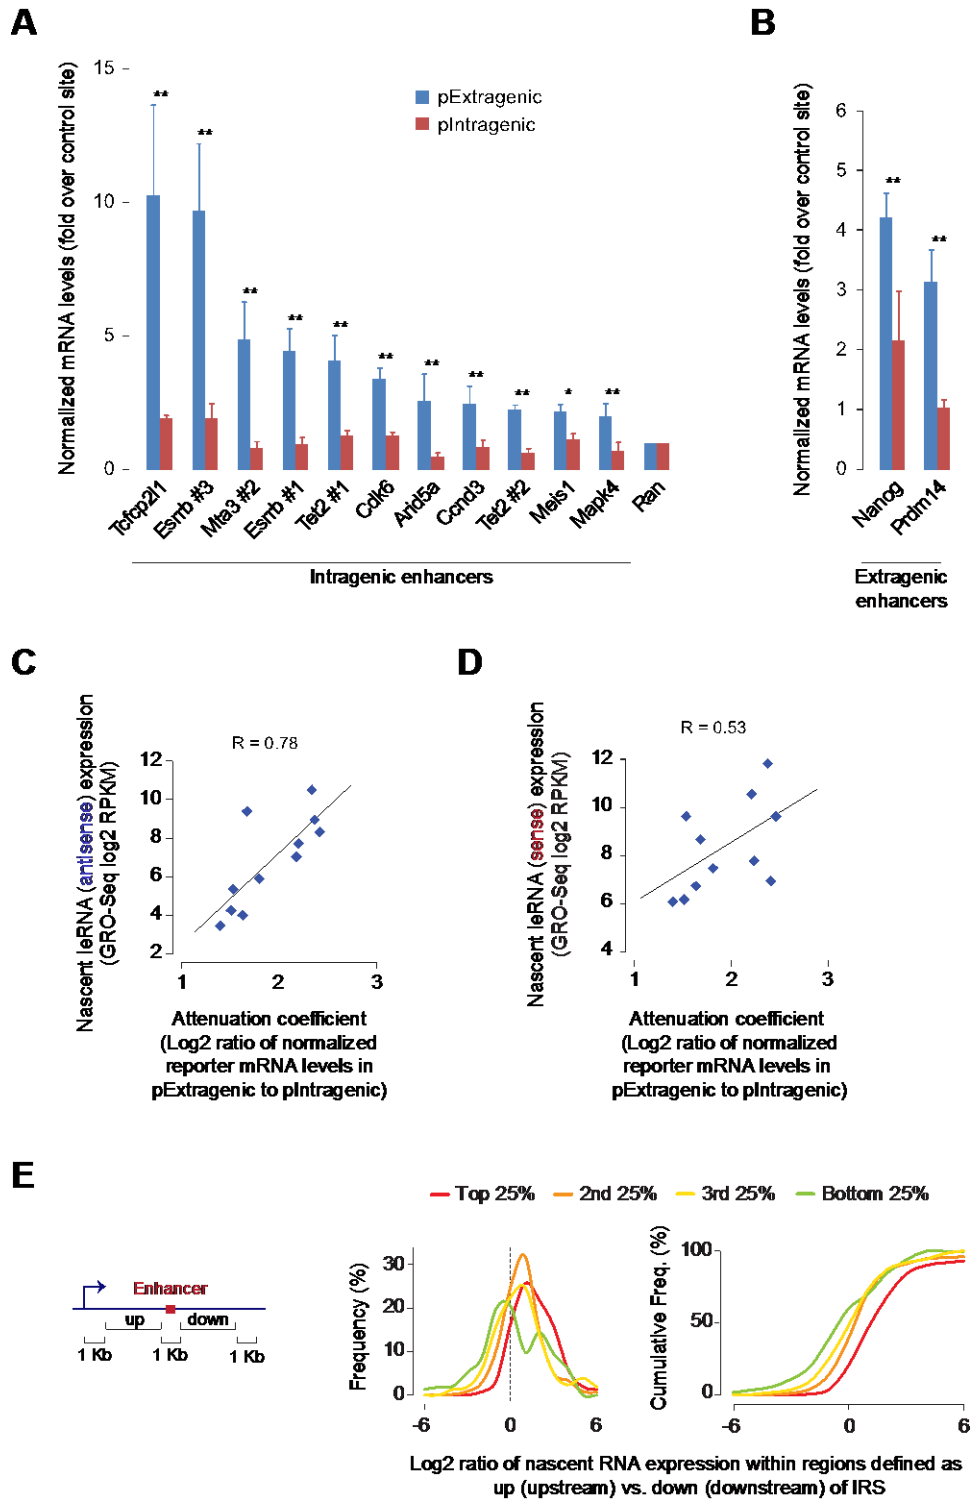

Figure S3 (related to Figure 3 and 4). Enhancers in intragenic position attenuate host gene transcription

- (A, B) Normalized mRNA levels of the reporter gene, in mouse ESCs, from pIntragenic and pExtragenic reporter constructs cloned with intragenic enhancers (A) or extragenic enhancers (B). Data are normalized to control sequence from Ran locus, which is set to 1. Data represents mean of  $n = 5$  biological replicates. Error bars represent SEM. \* $P < 0.05$ ; \*\*  $P < 0.01$  (Student's t-test; two-sided).
- (C, D) Scatter plot, similar to the ones in Figure 4A, D but using the GRO-Seq data from Williams et al. (Williams et al., 2015), showing the correlation between attenuation coefficient, calculated based on data shown in Figure 3D, and levels of nascent antisense (C) or sense (D) ieRNA expression from native, genomic locus.
- (E) *Left*: Schematic showing intragenic regions defined as upstream (up) and downstream (down) of intragenic enhancer. One kilobase (Kb) regions immediately downstream of TSS, immediately upstream of TES, and centered around the enhancer were excluded. *Middle*: Intragenic enhancers were binned into four groups based on their host gene expression. Frequency distribution of the ratios of GRO-Seq (Jonkers et al., 2014) read density within the 'up' region to that within the corresponding 'down' region for each group is shown. Only GRO-Seq reads from the sense strand was used. *Right*: Cumulative frequency distribution of the same data shown in the middle panel is shown.

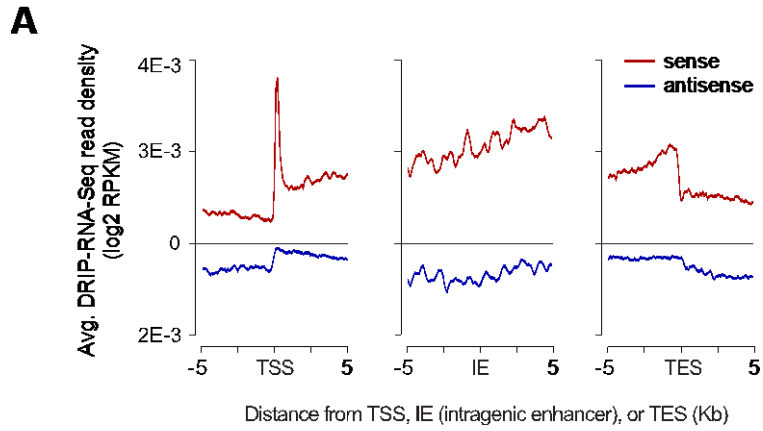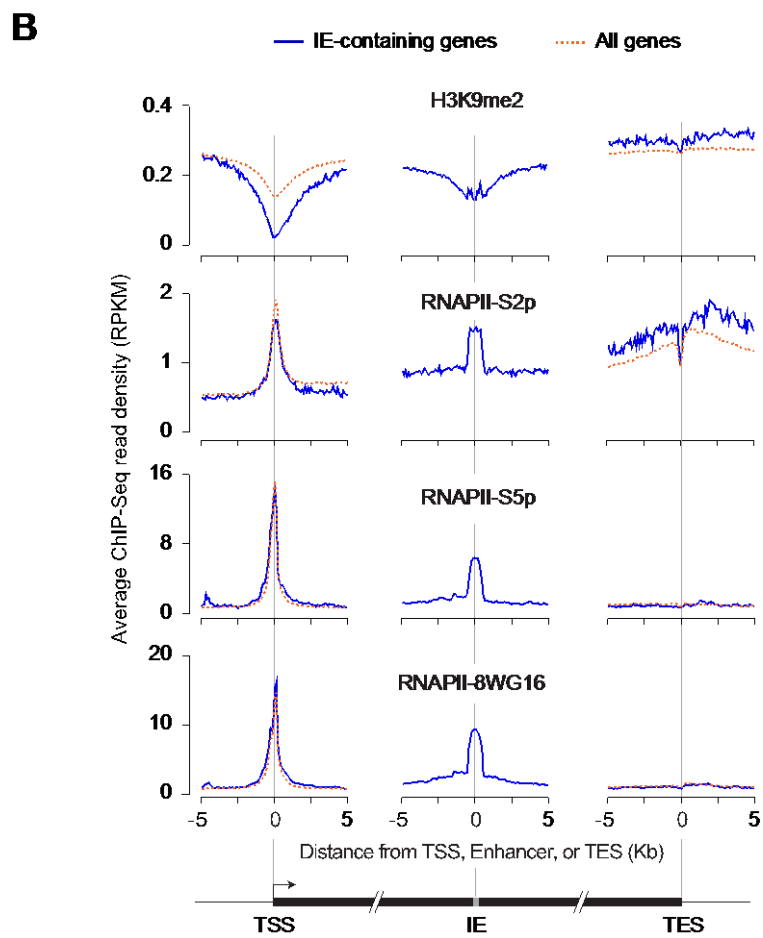

**Figure S4 (related to Figure 5). Intragenic enhancers are not enriched for R-loops or R-loop-mediated RNAi-dependent H3K9me2**



- (A) Read density plot showing relative enrichment of R-loops, as measured using DRIP-RNA-Seq in mouse ESCs (Chen et al., 2015), near TSS, intragenic enhancer (IE), and TES of intragenic enhancer-containing genes in mouse ESCs.
- (B) Read density plot showing relative levels (RPKM) of H3K9me2, RNAPII, and phosphorylated forms of RNAPII (RNAPII-S5P and RNAPII-S5P primarily associated with transcription initiation and elongation, respectively), as measured using CHIP-Seq in mouse ESCs (Brookes et al., 2012; Kurimoto et al., 2015; Rahl et al., 2010), near TSS, intragenic enhancer (IE), and TES of intragenic enhancer-containing genes in mouse ESCs.

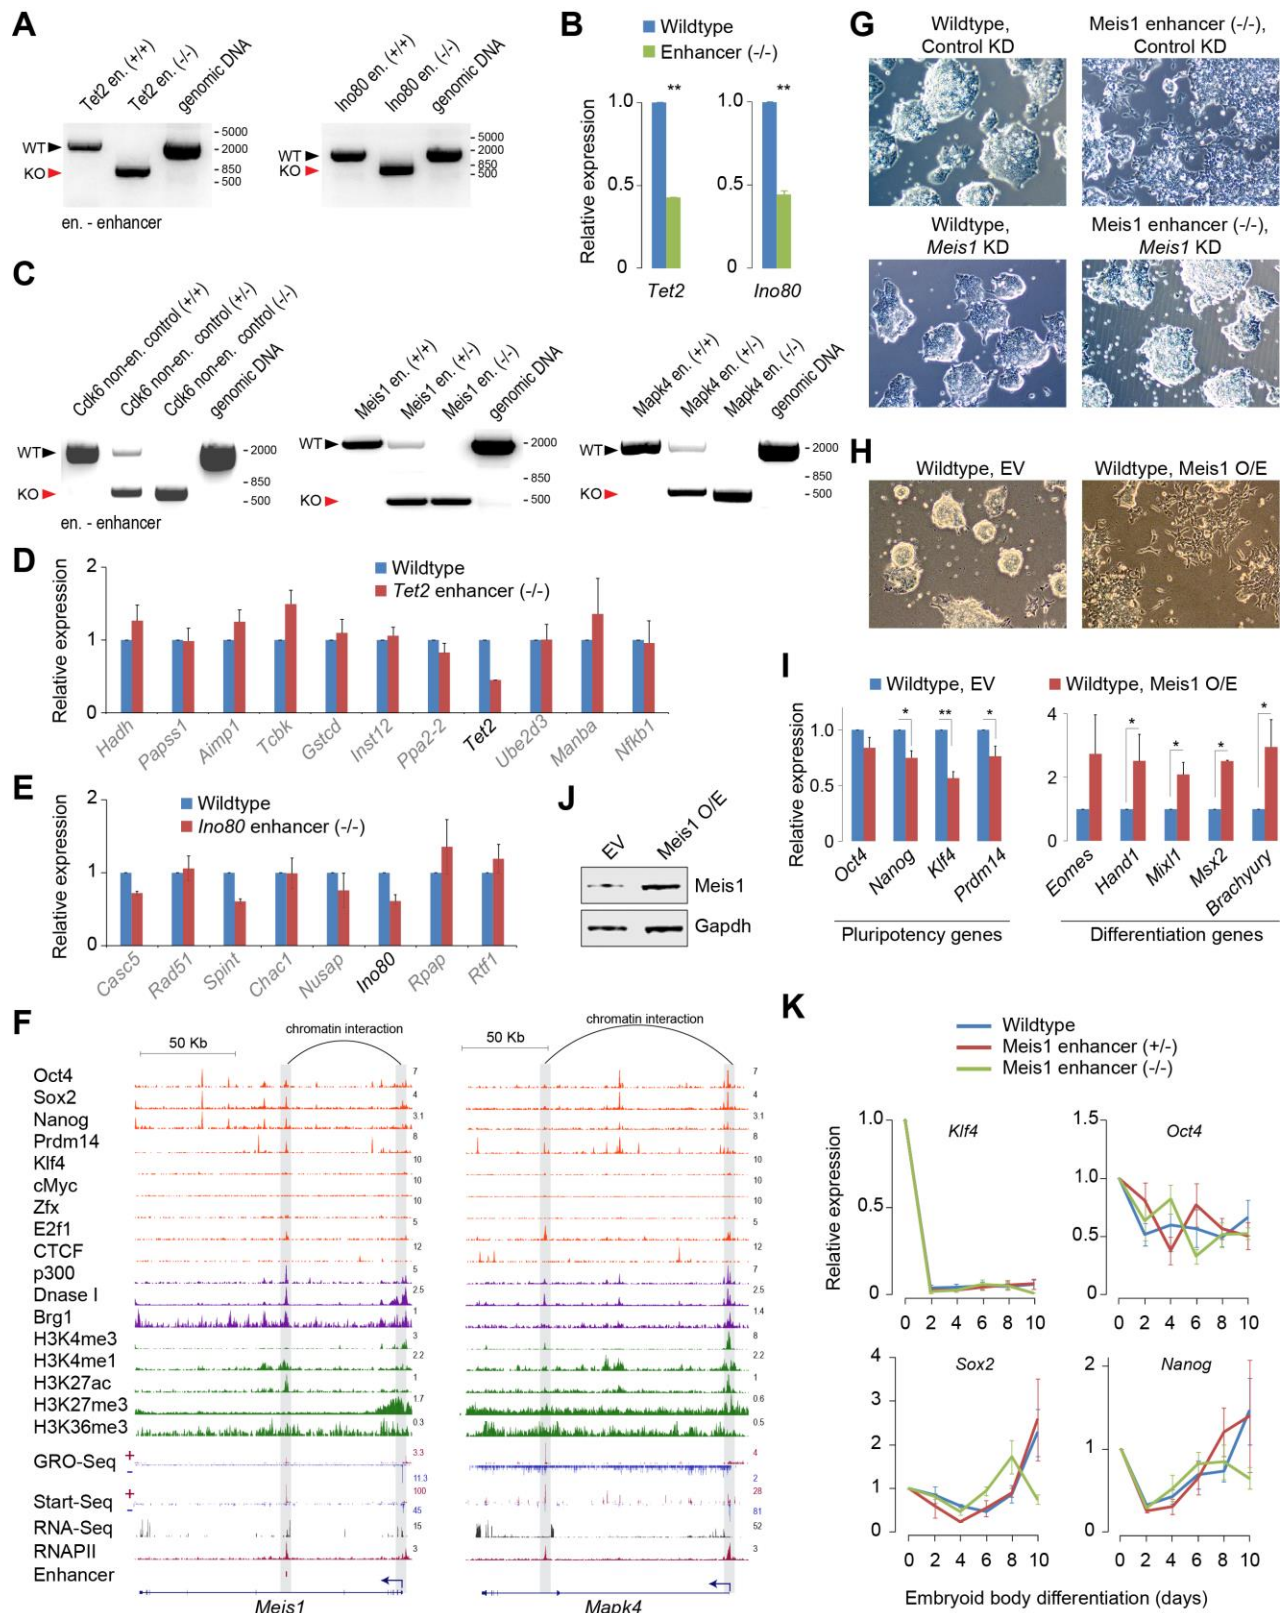

**Figure S5 (related to Figure 6). CRISPR/Cas9-mediated genetic deletion of candidate intragenic enhancers and a role for intragenic enhancer-mediated attenuation in cell-fate determination**

- (A) Genotyping of genomic DNA from enhancer knockout (-/-) clonal cell lines, using standard gel electrophoresis, showing loss of the wildtype (WT) allele in enhancer (-/-) mouse ESCs. Black and red arrows mark the expected genomic products for screening-primers designed to evaluate deletions. Bands excised from the gel were subsequently sequence-verified.
- (B) RT-qPCR analysis of mRNA levels of intragenic enhancer-containing genes *Tet2* and *Ino80* in corresponding wild-type and enhancer knockout (-/-) mouse ESCs. \*\* P < 0.01 (Student's t-test; two-sided)
- (C) Genotyping of genomic DNA from enhancer heterozygous (+/-) and knockout (-/-) clonal cell lines, using standard gel electrophoresis, showing loss of WT allele(s) in enhancer (+/-) and enhancer (-/-) mouse ESCs. Black and red arrows mark the expected genomic products for screening-primers designed to evaluate deletions. Bands excised from the gel were subsequently sequence-verified.
- (D, E) mRNA levels of genes within *Tet2* (D) or *Mapk4* (E) locus in wildtype or *Tet2* (*Ino80*, respectively) enhancer (-/-) ESCs. Data are normalized to *Actin*. Error bars represent SEM of three biological replicates.
- (F) Genome browser shot of *Meis1* and *Mapk4* loci showing ChIP-Seq read density profiles of RNAPII, GRO-Seq, Start-Seq, RNA-Seq, various transcription regulators and chromatin remodelers, and histone modifications in mouse ESCs. Known chromatin interaction between *Meis1/Mapk4* intragenic enhancer and its promoter in mouse ESCs (Schoenfelder et al., 2015) is shown at the top.
- (G) Colony morphology of wildtype and *Meis1* enhancer (-/-) mouse ESCs upon control or *Meis1* KD. Representative images, taken 96 h after siRNA transfection, are shown.
- (H) Colony morphology of mouse ESCs overexpressing *Meis1* or an empty vector (EV). Representative images, taken 96 h after plasmid transfection, are shown.
- (I) mRNA levels of pluripotency-associated ESC identity genes (left) and differentiation/developmental genes (right) in ESCs overexpressing *Meis1* or an empty vector (EV). Data are normalized to *Actin*. Error bars represent SEM of three biological replicates. \*P < 0.05; \*\*P < 0.01 (Student's t-test; two-sided).
- (J) Western blot analysis of *Meis1* (endogenous+exogenous) in mouse ESCs expressing EV or endogenous *Meis1*. *Gapdh* is used as a loading control.
- (K) mRNA levels of ESC identity genes during embryoid body formation of wildtype, *Meis1* enhancer heterozygous (+/-) and knockout (-/-) mouse ESCs. Data are normalized to *Actin*. Error bars represent SEM of three biological replicates.

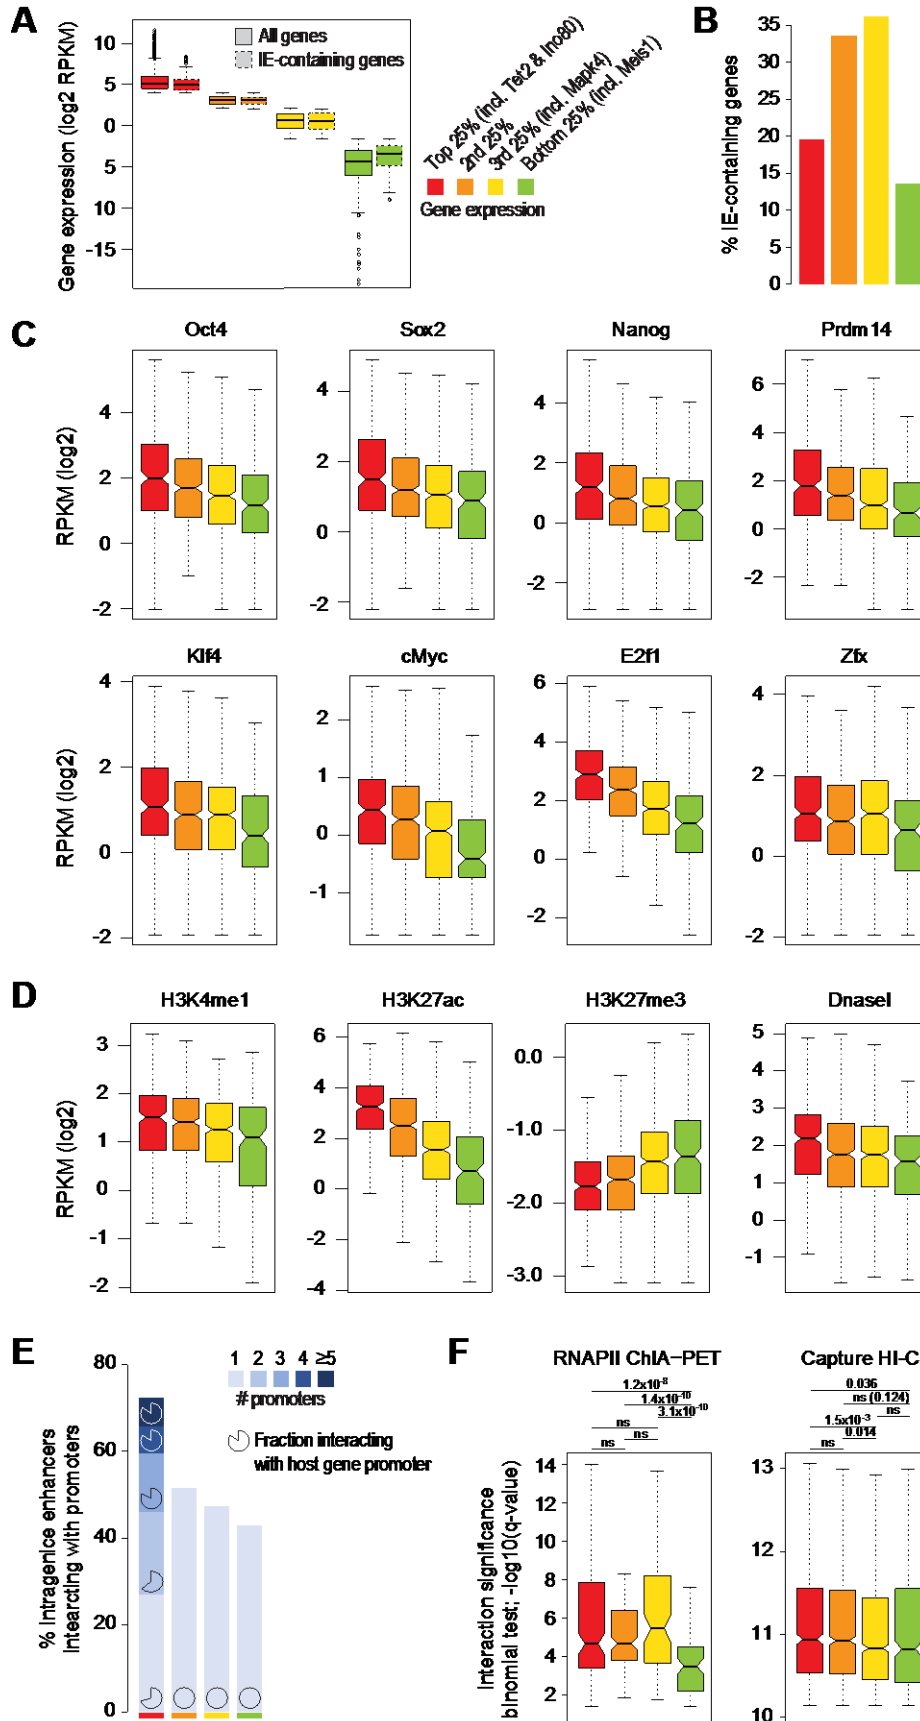

**Figure S6 (related to Figure 6). Enhancer strength and attenuation**

- (A) The set of all genes were binned into four quartiles based on their expression in mouse ESCs, and the expression of intragenic enhancer (IE)-containing (host) genes within each quartile is shown.
- (B) Percentage of IE-containing genes within each of the four quartiles; color code similar to that in (A).
- (C, D) Intragenic enhancers were binned into four groups based on their host gene expression; color code similar to that in (A). Intragenic enhancers within *Tet2* and *Ino80* are in the first quartile (top 25%) and those within *Mapk4* and *Meis1* are in the third and fourth quartiles, respectively. Box plots show relative levels (RPKM) of transcription factor occupancy (A) and enhancer-associated chromatin signatures (B) at intragenic enhancers in mouse ESCs (Chen et al., 2008; Creighton et al., 2010; Ma et al., 2011; Marson et al., 2008) (ENCODE, GSE31039 and GSE37074).
- (E) Bar plot shows the fraction of intragenic enhancers, from within each group, interacting with one or more gene promoters; enhancer-promoter interaction data from RNAPII ChIA-PET (Zhang et al., 2013) and Capture Hi-C (Schoenfelder et al., 2015) experiments in mouse ESCs was used. Shades of blue represent number of gene promoters enhancers interact with. Pie-charts are used to represent fraction of intragenic enhancers, within each class, that interact with host gene promoter.
- (F) Intragenic enhancers were binned into four groups (red, orange, yellow, and green) based on their host gene expression; color code similar to that in (A). Box plots show relative enhancer-promoter interaction significance, as assessed using RNAPII ChIA-PET (Zhang et al., 2013) and Capture Hi-C (Schoenfelder et al., 2015) experiments, in mouse ESCs. P-values shown were computed using the Wilcoxon-Mann-Whitney U test (two-sided).

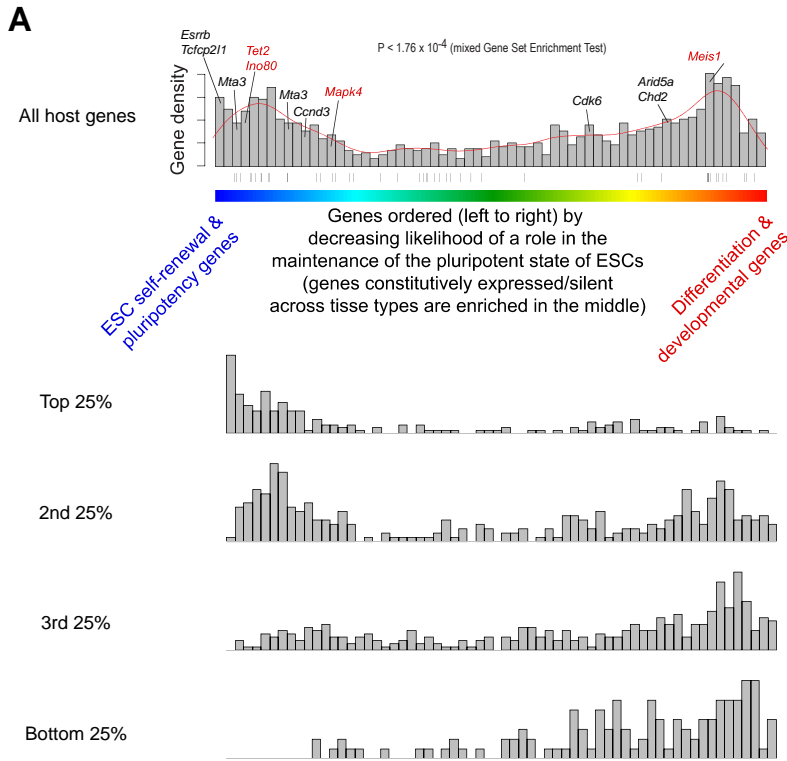

**C**

| Transcription factor | Motif | P-value                |
|----------------------|-------|------------------------|
| PU.1                 |       | $3.88 \times 10^{-26}$ |
| JunB                 |       | $4.15 \times 10^{-49}$ |
| Stat1                |       | $6.71 \times 10^{-5}$  |
| CTCF                 |       | 0.68                   |
| cMyc                 |       | 1.00                   |
| Zfx                  |       | 1.00                   |

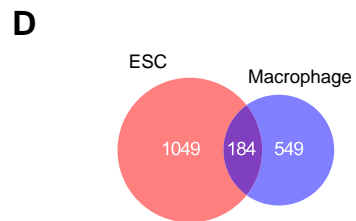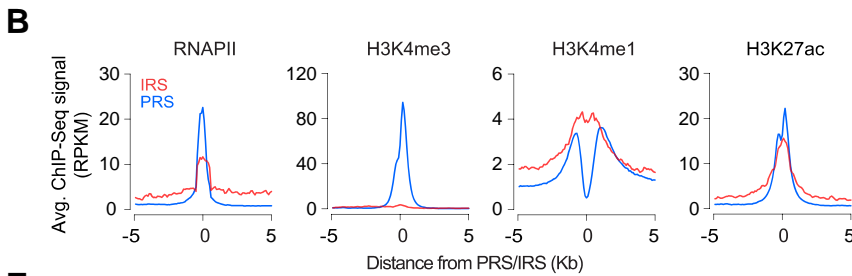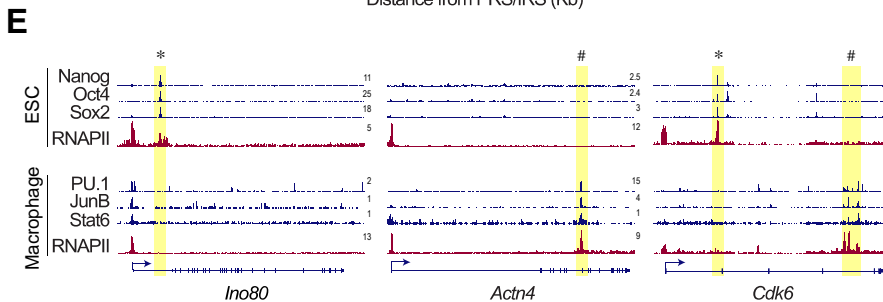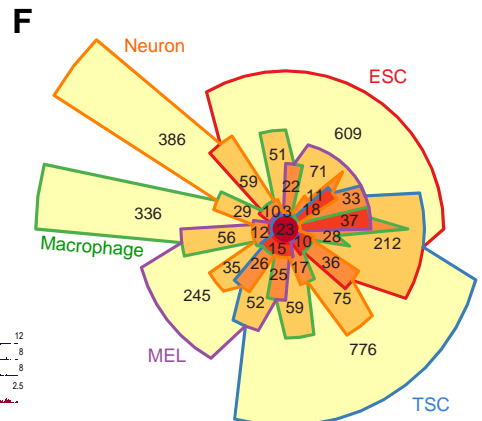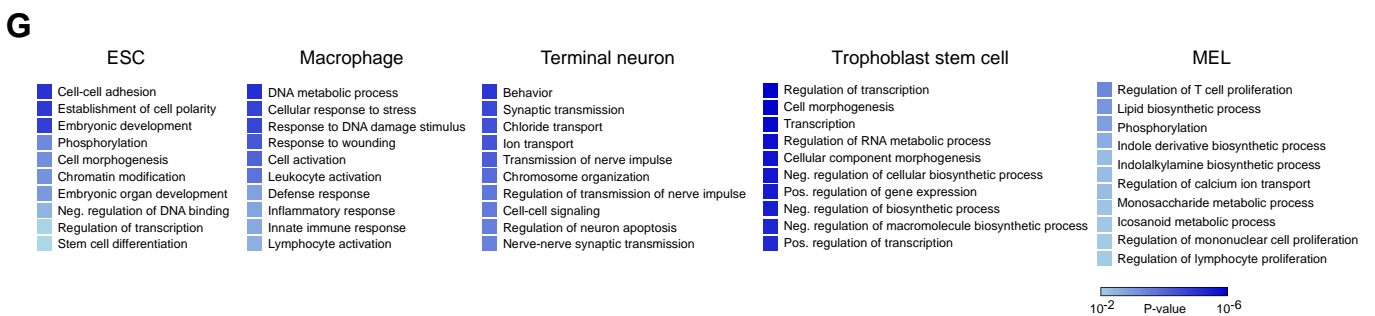

**Figure S7 (related to Figure 6). Functional characterization of intragenic enhancer-containing genes**

- (A) Functional characterization of intragenic enhancer-containing genes. *Top*: Frequency distribution of all intragenic enhancer-containing (host) genes in relation to list of genes, rank-ordered (left to right; x-axis) based on the likelihood of their role in the maintenance of mouse ESC identity (Cinghu et al., 2014). Candidate intragenic enhancer-containing genes are highlighted. Genes harboring intragenic enhancers are enriched for ESC identity genes (distribution on the left) and developmental/differentiation genes (distribution on the right). *Bottom*: Host genes were binned into four groups based on their host gene expression (high to low). For each group, frequency distribution (same as that in the top panel) is shown. Host genes with expression in the top 25% are enriched for ESC self-renewal and pluripotency genes. In contrast, host genes with expression in the bottom 25% are enriched for differentiation and developmental genes.
- (B) Read density plots showing relative levels (RPKM) of H3K4me3, H3K4me1 and H3K27ac at IRSs in mouse bone marrow-derived macrophages.
- (C) Relative enrichment of TF sequence recognition motifs within macrophage IRSs
- (D) Overlap between IRS-associated genes in mouse ESCs and macrophages.
- (E) Genome browser shots of select genes showing mouse ESC-specific (\*) and macrophage-specific (#) IRSs bound by cell-specific master transcription factors.
- (F) Chow-Ruskey diagram showing five-way overlap of intragenic enhancer-associated genes in mouse ESCs (polygon with a red colored border), macrophages (green polygon), terminal neurons (orange polygon), trophoblast stem cells (TSCs) (blue polygon) and murine erythroleukemia (MEL) (purple polygon) cells. Regions with yellow fill color mark cell type-specific intragenic enhancer-associated genes. Regions marked by shades of orange and red mark intersection between cell types. Regions with light and dark shade of orange for fill color represents intersection between two and three cell types, respectively. Regions with red shade for fill color represents intersection between four cell types and the region with reddish brown shade for fill color (the circle in the middle) represents the overlap of all five cell types. Area of each intersection is proportional to number of genes within the intersection.
- (G) Intragenic enhancer-associated genes have prominent roles in cell type-specific biology. Gene ontology (GO) categories enriched within intragenic enhancer-associated genes in mouse ESCs, macrophages, terminal neurons, trophoblast stem cells, and murine erythroleukemia (MEL) cells. P-value for each enriched GO category is displayed as a blue square, with color scale bar denoted below.
